# Supplementary material for: Interplay of Hydration and Protonation Dynamics in the K-Channel of Cytochrome c Oxidase
Source: MDPI journal article supplement (doi:10.3390/biom12111615), 2022-11-01
Supplement: s1 [file s1]

Supplementary Information for  
Interplay of Hydration, Water Mobility, and Proton Transfer  
in the K-channel of CcO

Rene F. Gorriz and Petra Imhof

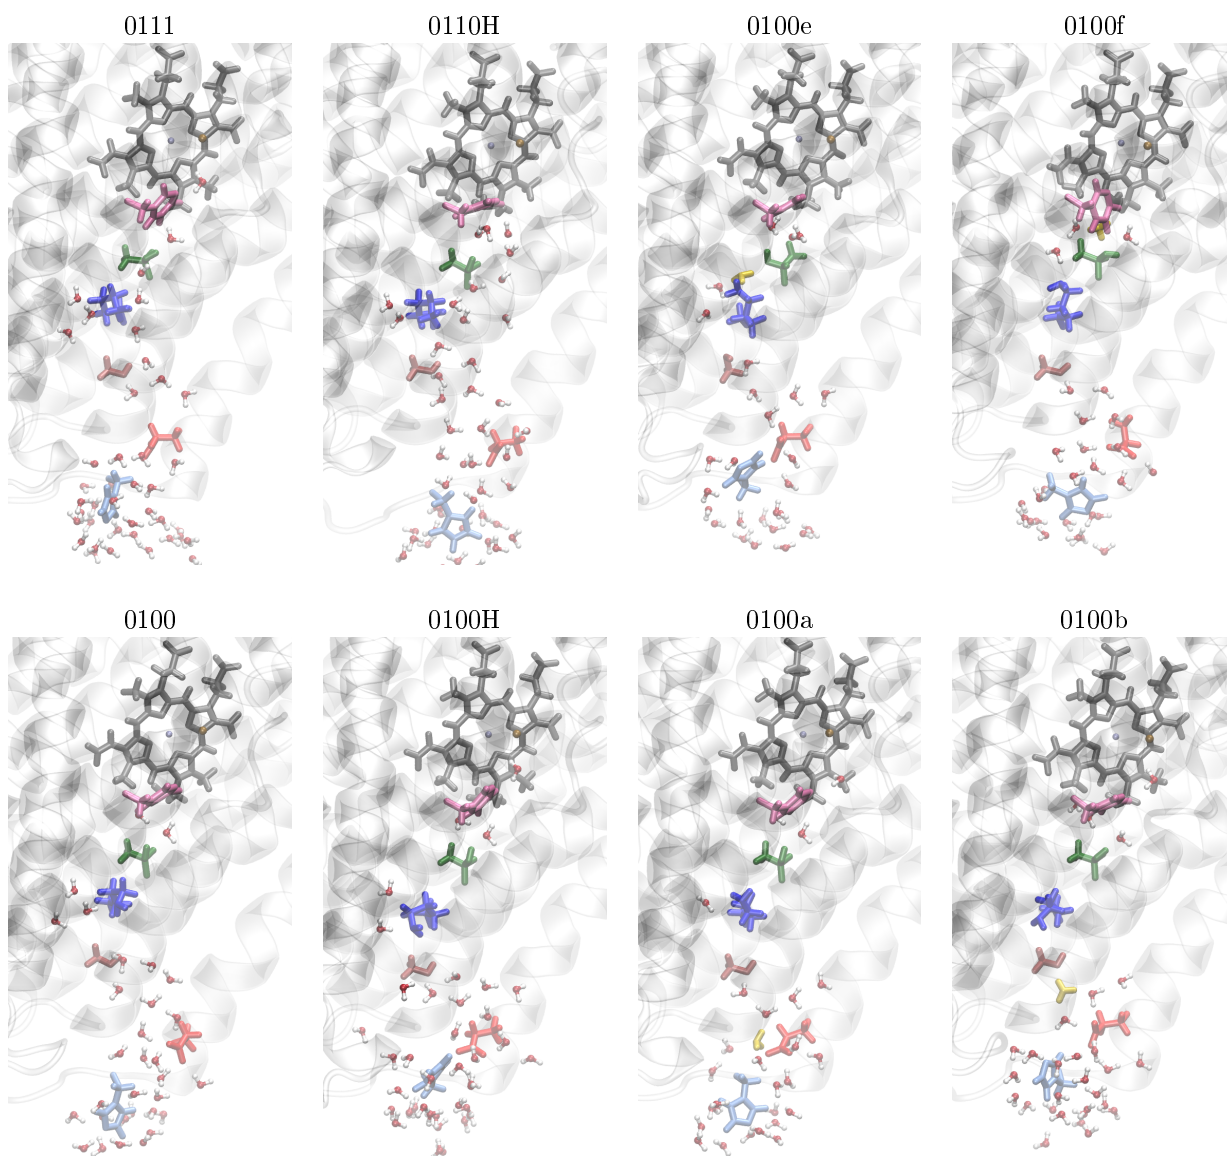

Figure S1: Median structures of the K-channel of CcO from the MD simulations with different protonation states. Important protein residues are marked by their labels and colours: H96 (light blue), E101 (red), S365 (brown), K362 (blue), T359 (dark green), Y288 (magenta), and the  $\text{H}_3\text{O}^+$  ion (yellow), if present.

## Water

Table S1: Average accumulated number of water molecules along the cylinder axis in the K-Channel of CcO.

| Height       |   | 0110           | 0111           | 0110H          | 0100d          | 0100e          | 0100f          |
|--------------|---|----------------|----------------|----------------|----------------|----------------|----------------|
| $\leq 13.0$  |   | $30.1 \pm 4.2$ | $15.5 \pm 0.7$ | $30.9 \pm 8.6$ | $24.0 \pm 2.5$ | $16.7 \pm 3.6$ | $13.7 \pm 3.3$ |
| $\leq 11.0$  | ▼ | $29.4 \pm 3.2$ | $15.3 \pm 0.9$ | $30.3 \pm 8.1$ | $23.7 \pm 2.4$ | $16.7 \pm 3.6$ | $13.7 \pm 3.3$ |
| $\leq 9.0$   |   | $27.8 \pm 3.2$ | $14.2 \pm 0.4$ | $28.8 \pm 7.7$ | $22.7 \pm 1.9$ | $15.8 \pm 3.5$ | $13.7 \pm 3.3$ |
| $\leq 7.0$   |   | $26.3 \pm 2.4$ | $13.5 \pm 0.2$ | $27.3 \pm 6.8$ | $21.4 \pm 1.6$ | $15.7 \pm 3.4$ | $13.0 \pm 3.4$ |
| $\leq 5.0$   |   | $23.7 \pm 2.3$ | $11.4 \pm 0.7$ | $25.4 \pm 6.7$ | $18.9 \pm 1.5$ | $13.9 \pm 3.0$ | $11.9 \pm 3.3$ |
| $\leq 3.0$   | ▼ | $21.6 \pm 2.2$ | $9.7 \pm 0.9$  | $23.7 \pm 6.7$ | $16.8 \pm 1.6$ | $13.5 \pm 2.5$ | $10.9 \pm 3.2$ |
| $\leq 1.0$   |   | $19.5 \pm 2.8$ | $7.7 \pm 1.0$  | $21.4 \pm 6.8$ | $14.3 \pm 1.2$ | $12.5 \pm 1.7$ | $10.7 \pm 3.2$ |
| $\leq -1.0$  | ✕ | $17.8 \pm 2.8$ | $6.6 \pm 0.9$  | $19.8 \pm 6.6$ | $12.8 \pm 0.9$ | $10.8 \pm 2.0$ | $10.7 \pm 3.2$ |
| $\leq -3.0$  |   | $16.1 \pm 2.9$ | $5.4 \pm 0.8$  | $17.9 \pm 6.4$ | $11.2 \pm 0.8$ | $9.8 \pm 2.2$  | $10.7 \pm 3.2$ |
| $\leq -5.0$  |   | $14.4 \pm 2.7$ | $4.7 \pm 0.5$  | $15.8 \pm 6.2$ | $10.0 \pm 1.1$ | $9.4 \pm 1.8$  | $10.5 \pm 3.3$ |
| $\leq -7.0$  | ► | $12.2 \pm 2.4$ | $3.8 \pm 0.2$  | $13.3 \pm 5.8$ | $8.7 \pm 1.0$  | $7.7 \pm 1.0$  | $10.0 \pm 3.4$ |
| $\leq -9.0$  |   | $9.3 \pm 2.3$  | $2.5 \pm 0.3$  | $10.2 \pm 5.6$ | $6.5 \pm 0.8$  | $5.6 \pm 0.5$  | $8.1 \pm 3.6$  |
| $\leq -11.0$ |   | $6.5 \pm 2.2$  | $2.2 \pm 0.3$  | $6.9 \pm 4.5$  | $4.3 \pm 0.6$  | $3.8 \pm 0.6$  | $6.1 \pm 3.2$  |
| $\leq -13.0$ | ■ | $3.7 \pm 1.3$  | $1.2 \pm 0.5$  | $4.1 \pm 3.2$  | $2.3 \pm 0.6$  | $2.0 \pm 0.6$  | $3.4 \pm 2.4$  |
| $\leq -15.0$ | ▲ | $1.4 \pm 0.5$  | $0.2 \pm 0.0$  | $1.5 \pm 1.2$  | $0.7 \pm 0.2$  | $0.7 \pm 0.1$  | $1.4 \pm 1.1$  |

| Height       |   | 0100          | 0101          | 0100H          | 0100a         | 0100b         | 0100c          |
|--------------|---|---------------|---------------|----------------|---------------|---------------|----------------|
| $\leq 13.0$  |   | $7.5 \pm 4.4$ | $6.7 \pm 2.0$ | $12.0 \pm 0.3$ | $9.9 \pm 4.2$ | $9.5 \pm 2.4$ | $19.9 \pm 2.2$ |
| $\leq 11.0$  | ▼ | $7.2 \pm 4.5$ | $6.7 \pm 2.0$ | $11.8 \pm 0.5$ | $9.7 \pm 4.1$ | $9.5 \pm 2.4$ | $19.2 \pm 2.1$ |
| $\leq 9.0$   |   | $6.9 \pm 4.3$ | $6.1 \pm 1.7$ | $11.0 \pm 0.3$ | $8.4 \pm 4.2$ | $8.4 \pm 2.4$ | $18.4 \pm 2.2$ |
| $\leq 7.0$   |   | $6.7 \pm 4.3$ | $6.1 \pm 1.6$ | $10.9 \pm 0.3$ | $8.2 \pm 4.2$ | $8.4 \pm 2.5$ | $17.6 \pm 2.2$ |
| $\leq 5.0$   |   | $5.4 \pm 4.0$ | $5.5 \pm 1.5$ | $9.9 \pm 0.5$  | $6.9 \pm 3.8$ | $7.7 \pm 2.3$ | $16.3 \pm 1.7$ |
| $\leq 3.0$   | ▼ | $5.0 \pm 4.2$ | $4.8 \pm 1.3$ | $9.3 \pm 0.6$  | $6.4 \pm 3.9$ | $6.7 \pm 2.3$ | $15.6 \pm 1.4$ |
| $\leq 1.0$   |   | $4.4 \pm 4.0$ | $3.9 \pm 1.2$ | $8.6 \pm 0.6$  | $5.9 \pm 3.6$ | $6.7 \pm 2.2$ | $15.1 \pm 0.9$ |
| $\leq -1.0$  | ✕ | $3.5 \pm 3.8$ | $3.2 \pm 1.0$ | $7.8 \pm 0.7$  | $5.4 \pm 3.3$ | $6.4 \pm 2.2$ | $14.7 \pm 0.5$ |
| $\leq -3.0$  |   | $3.2 \pm 3.8$ | $2.2 \pm 0.9$ | $7.4 \pm 0.7$  | $4.9 \pm 3.5$ | $5.8 \pm 2.3$ | $14.3 \pm 0.4$ |
| $\leq -5.0$  |   | $3.1 \pm 3.8$ | $2.1 \pm 0.8$ | $7.2 \pm 0.6$  | $4.8 \pm 3.4$ | $5.7 \pm 2.4$ | $11.9 \pm 0.6$ |
| $\leq -7.0$  | ► | $3.0 \pm 3.6$ | $2.1 \pm 0.8$ | $7.0 \pm 0.6$  | $4.6 \pm 3.2$ | $5.3 \pm 2.2$ | $9.9 \pm 1.3$  |
| $\leq -9.0$  |   | $2.3 \pm 2.8$ | $1.6 \pm 1.0$ | $5.4 \pm 0.9$  | $3.3 \pm 2.4$ | $4.5 \pm 1.7$ | $7.2 \pm 1.3$  |
| $\leq -11.0$ |   | $1.6 \pm 2.0$ | $1.1 \pm 0.8$ | $3.2 \pm 0.7$  | $1.6 \pm 1.2$ | $2.9 \pm 1.2$ | $4.6 \pm 1.1$  |
| $\leq -13.0$ | ■ | $0.7 \pm 0.9$ | $0.9 \pm 0.7$ | $1.4 \pm 0.5$  | $0.8 \pm 0.6$ | $1.6 \pm 0.7$ | $2.3 \pm 0.9$  |
| $\leq -15.0$ | ▲ | $0.2 \pm 0.3$ | $0.1 \pm 0.1$ | $0.5 \pm 0.1$  | $0.3 \pm 0.2$ | $0.4 \pm 0.2$ | $0.7 \pm 0.3$  |

Table S2: Average number of water molecules in the K-channel of CcO, at different distances to the cylinder axis.

| Model | $r \leq 1.0$  | $r \leq 3.5$   | $r \leq 5.0$   | $r \leq 6.5$   | $r \leq 9.5$   | polyhedron     |
|-------|---------------|----------------|----------------|----------------|----------------|----------------|
| 0100f | $0.4 \pm 0.0$ | $6.9 \pm 1.1$  | $9.7 \pm 1.8$  | $12.8 \pm 2.2$ | $17.4 \pm 3.6$ | $8.5 \pm 2.6$  |
| 0100e | $1.2 \pm 0.2$ | $8.9 \pm 1.2$  | $12.2 \pm 1.0$ | $14.4 \pm 1.2$ | $17.3 \pm 1.1$ | $10.7 \pm 1.5$ |
| 0100d | $1.7 \pm 0.2$ | $13.4 \pm 1.3$ | $21.2 \pm 0.7$ | $25.9 \pm 0.3$ | $30.7 \pm 0.8$ | $20.7 \pm 0.7$ |
| 0110H | $1.5 \pm 0.2$ | $11.7 \pm 1.7$ | $18.0 \pm 3.3$ | $23.1 \pm 4.9$ | $31.2 \pm 9.1$ | $18.2 \pm 3.1$ |
| 0111  | $1.0 \pm 0.1$ | $7.8 \pm 0.2$  | $10.5 \pm 0.5$ | $12.7 \pm 0.7$ | $15.5 \pm 0.7$ | $12.1 \pm 0.5$ |
| 0110  | $1.7 \pm 0.5$ | $12.6 \pm 0.5$ | $19.7 \pm 1.7$ | $24.2 \pm 2.3$ | $30.1 \pm 4.2$ | $19.4 \pm 0.9$ |
| 0100c | $0.4 \pm 0.2$ | $5.3 \pm 0.2$  | $8.3 \pm 0.5$  | $11.1 \pm 0.9$ | $15.9 \pm 2.4$ | $9.7 \pm 4.4$  |
| 0100b | $0.4 \pm 0.1$ | $5.8 \pm 0.1$  | $8.4 \pm 0.1$  | $10.3 \pm 0.5$ | $14.0 \pm 0.9$ | $11.5 \pm 3.9$ |
| 0100a | $0.2 \pm 0.2$ | $4.1 \pm 1.1$  | $6.5 \pm 1.3$  | $8.0 \pm 0.9$  | $11.3 \pm 1.9$ | $6.9 \pm 1.0$  |
| 0100H | $0.3 \pm 0.1$ | $4.3 \pm 0.4$  | $6.6 \pm 0.3$  | $8.6 \pm 0.3$  | $12.0 \pm 0.3$ | $6.5 \pm 0.5$  |
| 0101  | $0.1 \pm 0.0$ | $2.3 \pm 0.5$  | $3.1 \pm 0.9$  | $4.2 \pm 1.5$  | $6.7 \pm 2.0$  | $5.5 \pm 4.1$  |
| 0100  | $0.2 \pm 0.1$ | $2.7 \pm 1.7$  | $3.9 \pm 2.6$  | $5.0 \pm 3.2$  | $7.5 \pm 4.4$  | $2.7 \pm 3.4$  |

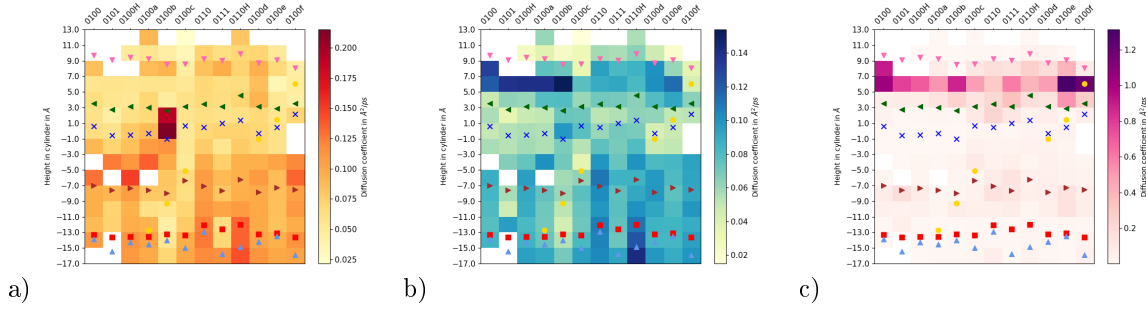

Figure S2: Water mobility in the different components a) height: along the cylinder Axis, b) radial: distance to cylinder axis, and c) angular component. The symbols mark the average height of protein residues H96 (light blue triangle  $\triangle$ ), E101 (red square  $\blacksquare$ ), S365 (brown triangle-right  $\blacktriangleright$ ), K362 (blue cross  $\times$ ), T359 (green triangle-left  $\blacktriangleleft$ ), Y288 (magenta triangle-down  $\blacktriangledown$ ), and position of the  $\text{H}_3\text{O}^+$  ion (yellow circle  $\odot$ ), if present. Residues with an excess proton are marked by a circle around the respective symbol.

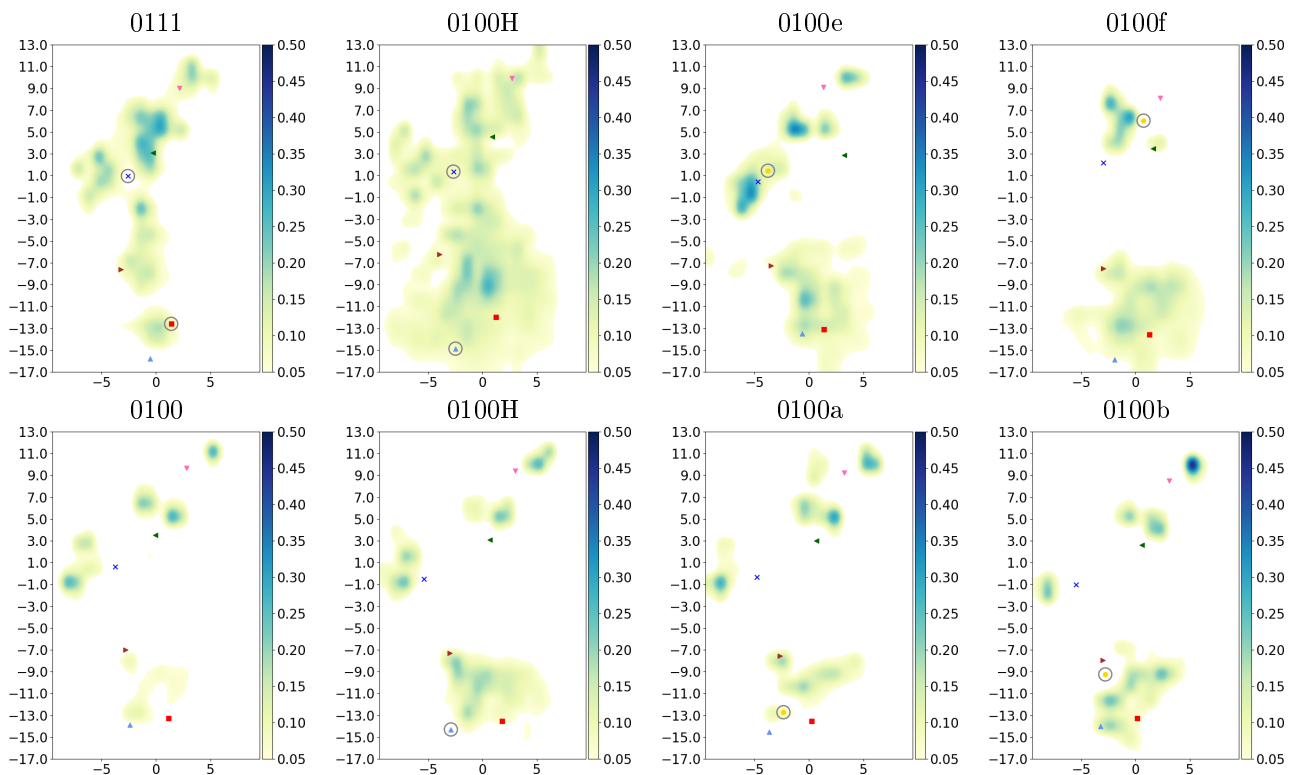

Figure S3: Projection of water occupancy in the K-channel of CcO with different protonation states. The symbols mark the average height of protein residues H96 (light blue triangle  $\blacktriangle$ ), E101 (red square  $\blacksquare$ ), S365 (brown triangle-right  $\blacktriangleright$ ), K362 (blue cross  $\times$ ), T359 (green triangle-left  $\blacktriangleleft$ ), Y288 (magenta triangle-down  $\blacktriangledown$ ), and position of the  $\text{H}_3\text{O}^+$  ion (yellow circle  $\bullet$ ), if present. Residues with an excess proton are marked by a circle around the respective symbol.

## Protein residues

### Dihedral angles

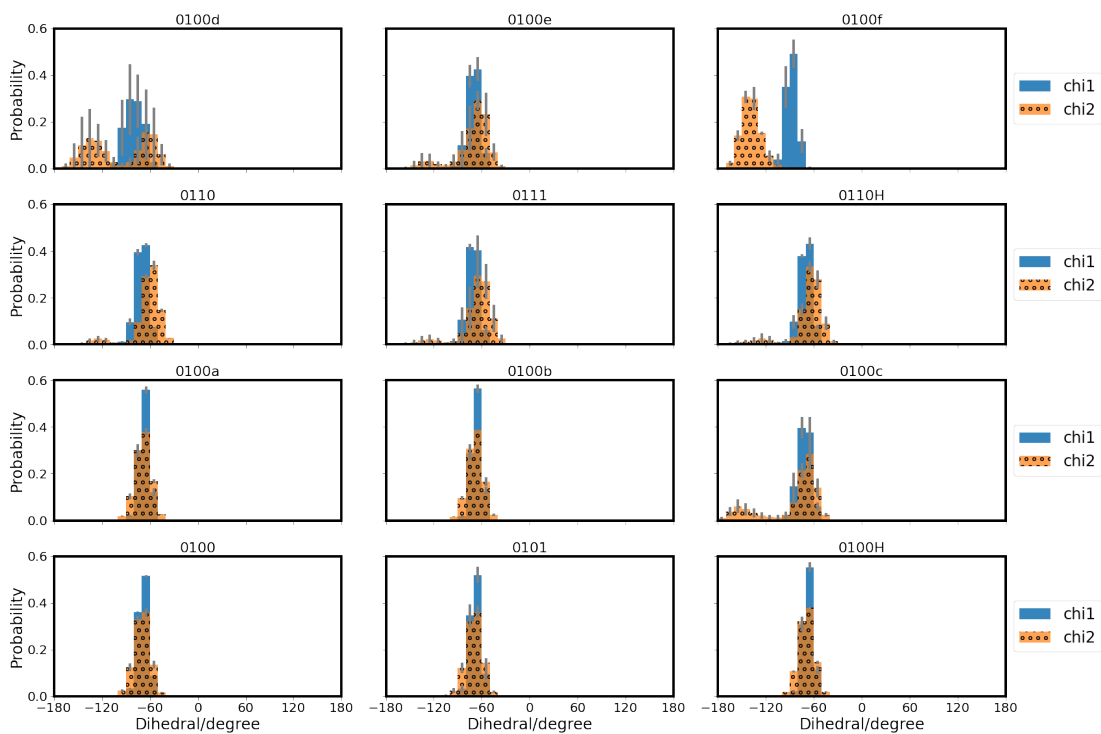

Figure S4: Probability distributions of side chain dihedral angles of Y288.

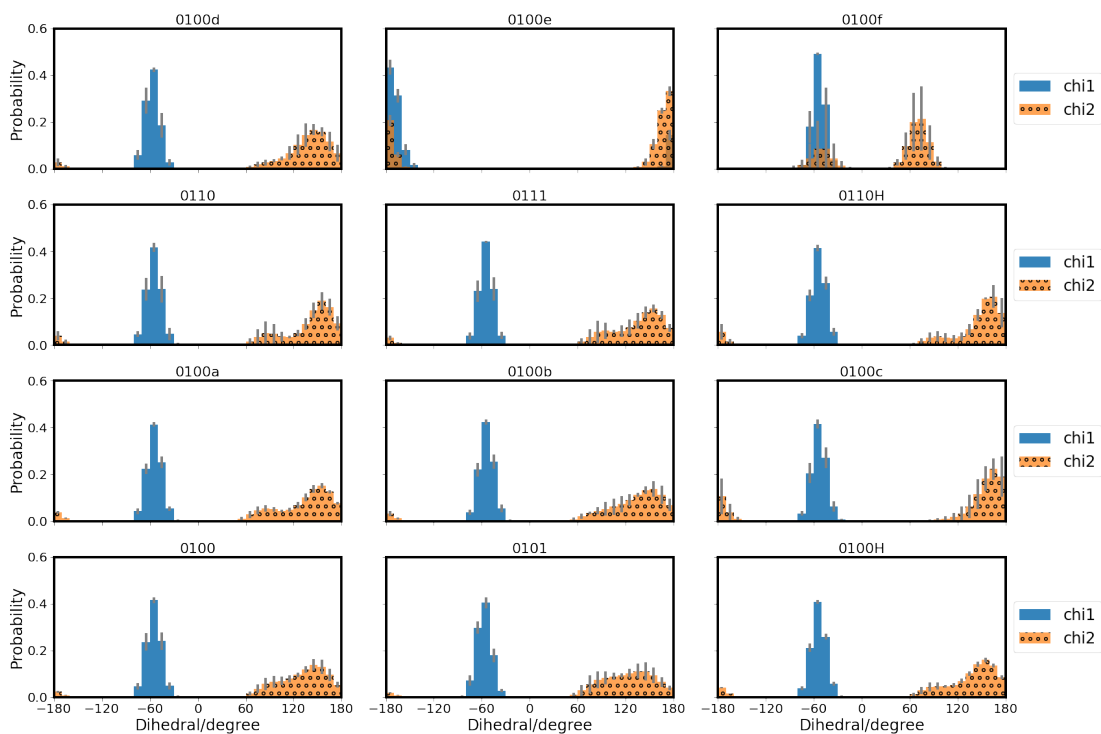

Figure S5: Probability distributions of side chain dihedral angles of T359.

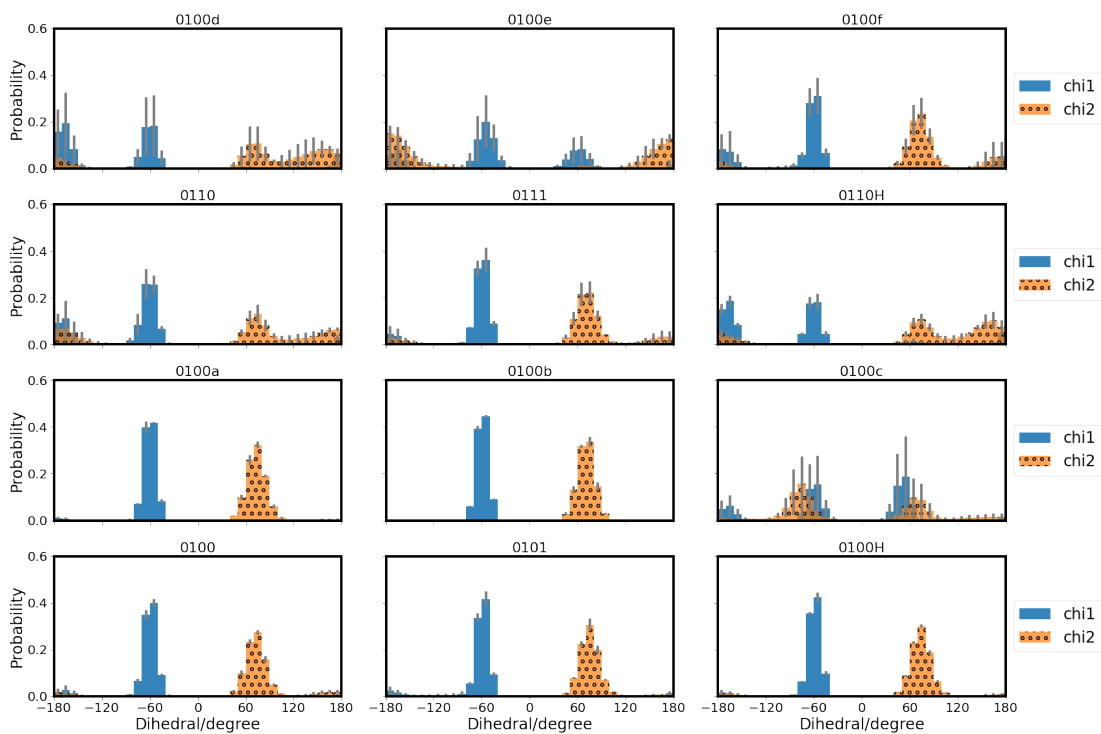

Figure S6: Probability distributions of side chain dihedral angles of S365.

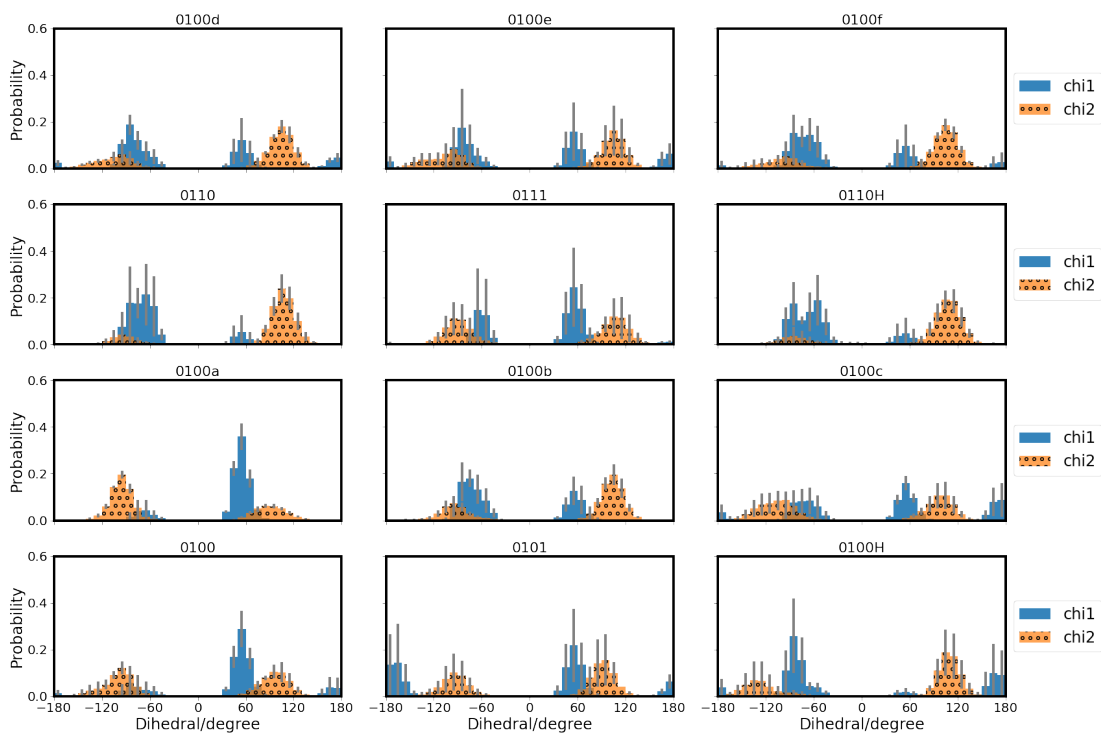

Figure S7: Probability distributions of side chain dihedral angles of H96.

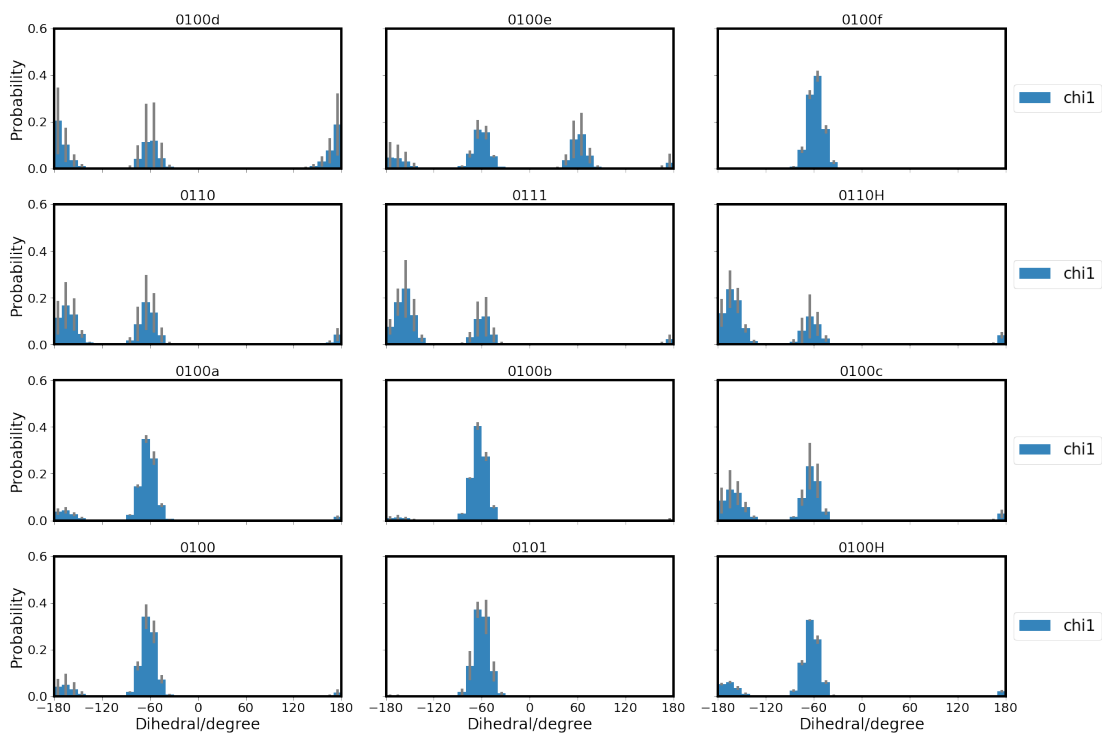

Figure S8: Probability distributions of side chain dihedral angle  $\chi_1$  of K362.

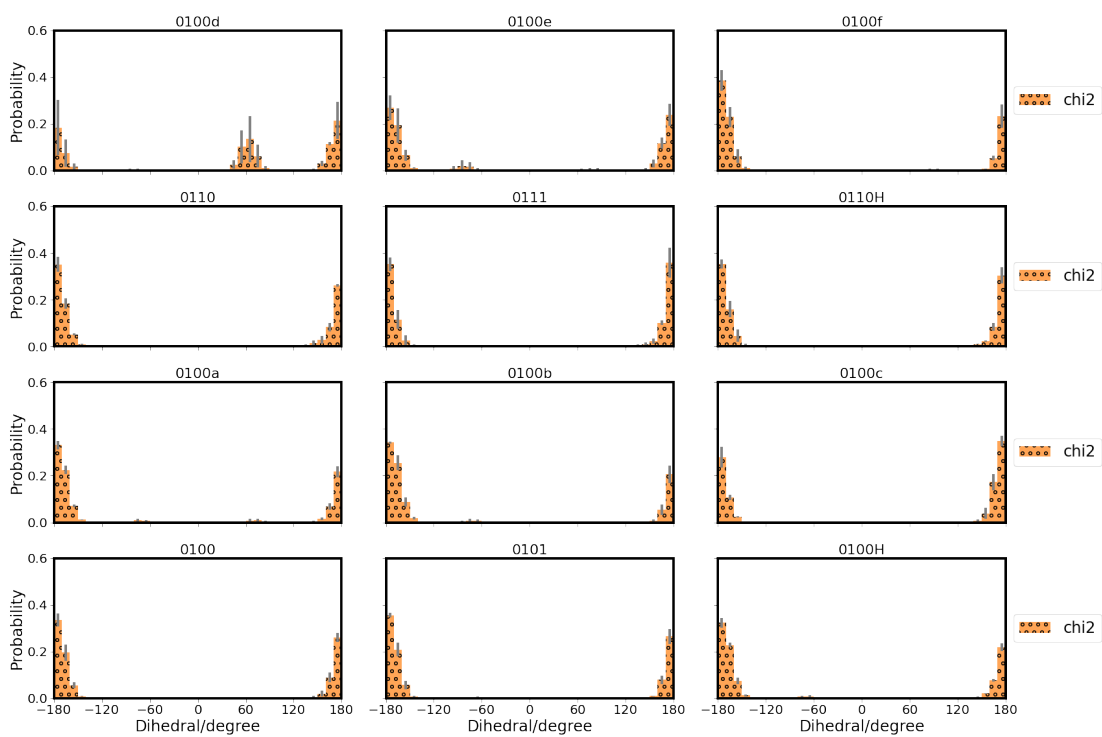

Figure S9: Probability distributions of side chain dihedral angle  $\chi_2$  of K362.



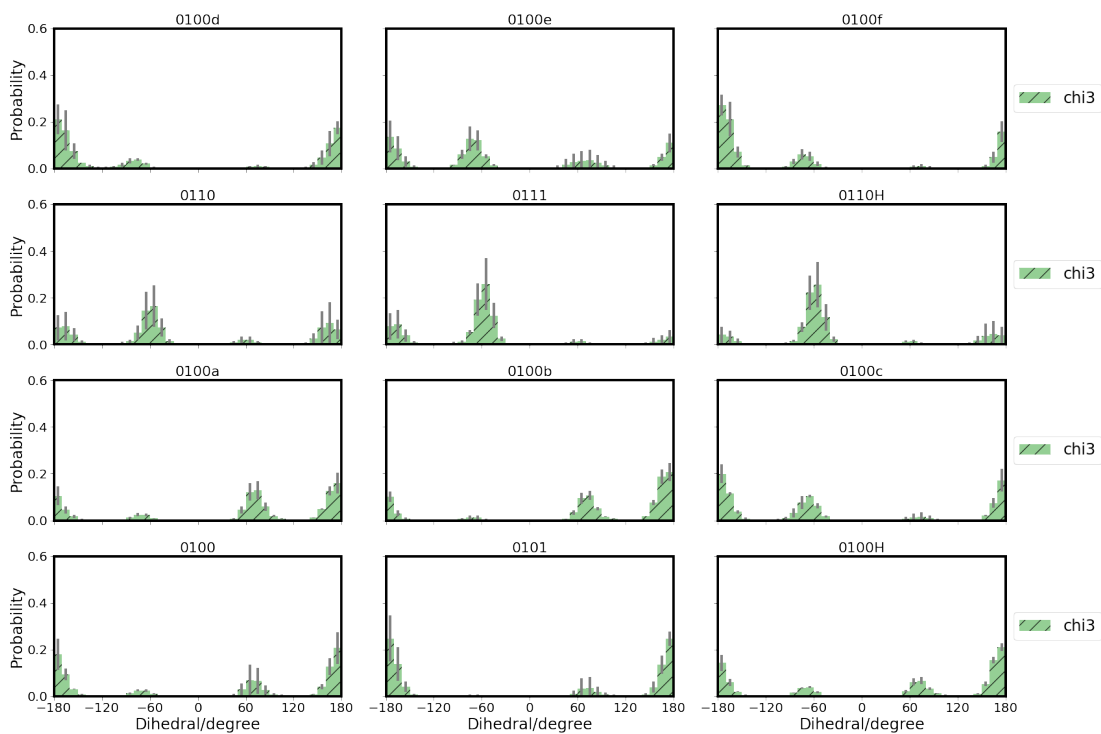

Figure S10: Probability distributions of side chain dihedral angle  $\chi_3$  of K362.

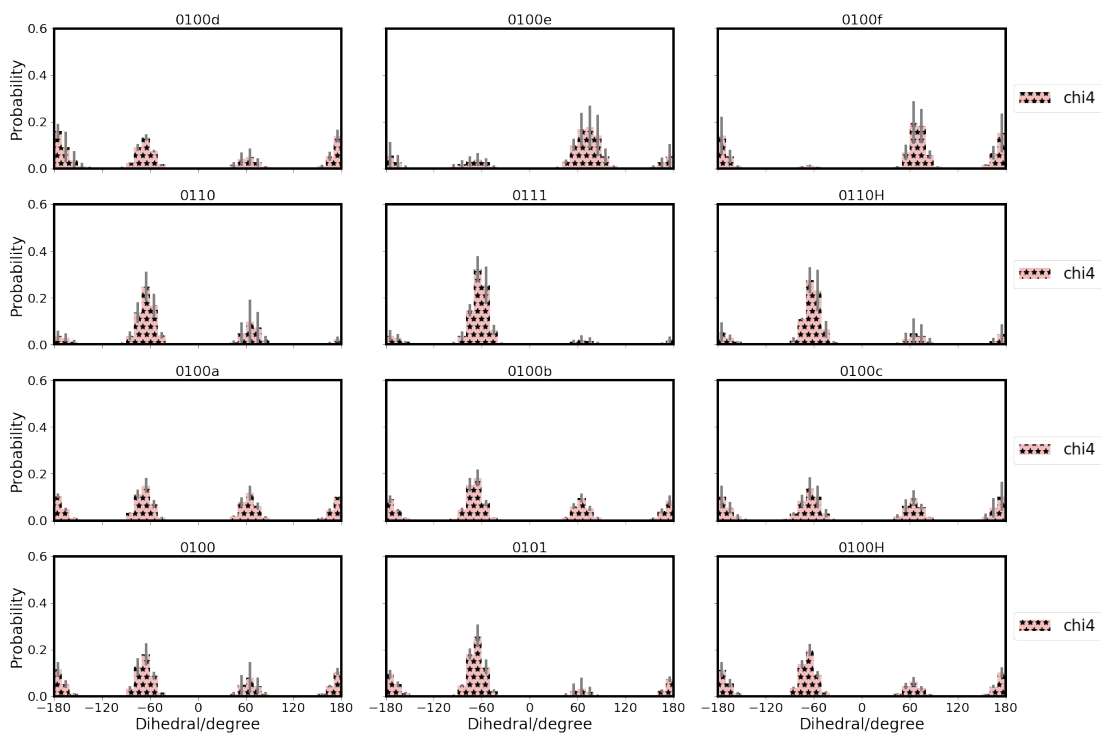

Figure S11: Probability distributions of side chain dihedral angle  $\chi_4$  of K362.

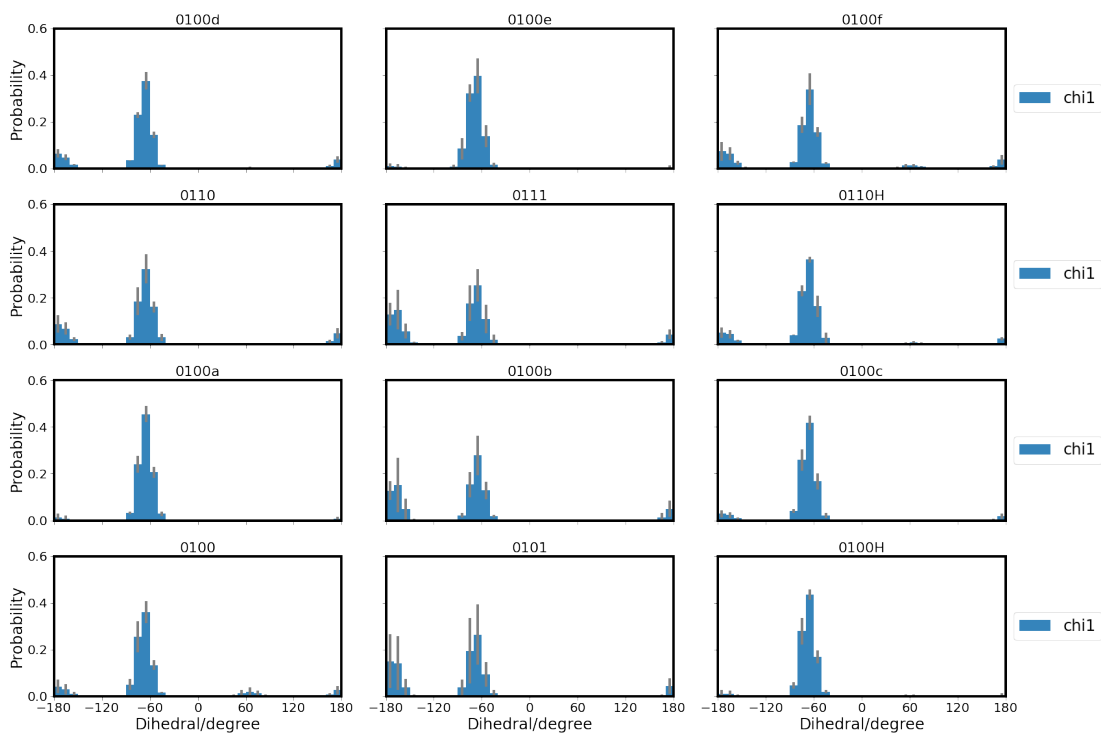

Figure S12: Probability distributions of side chain dihedral angle chi1 of E101.

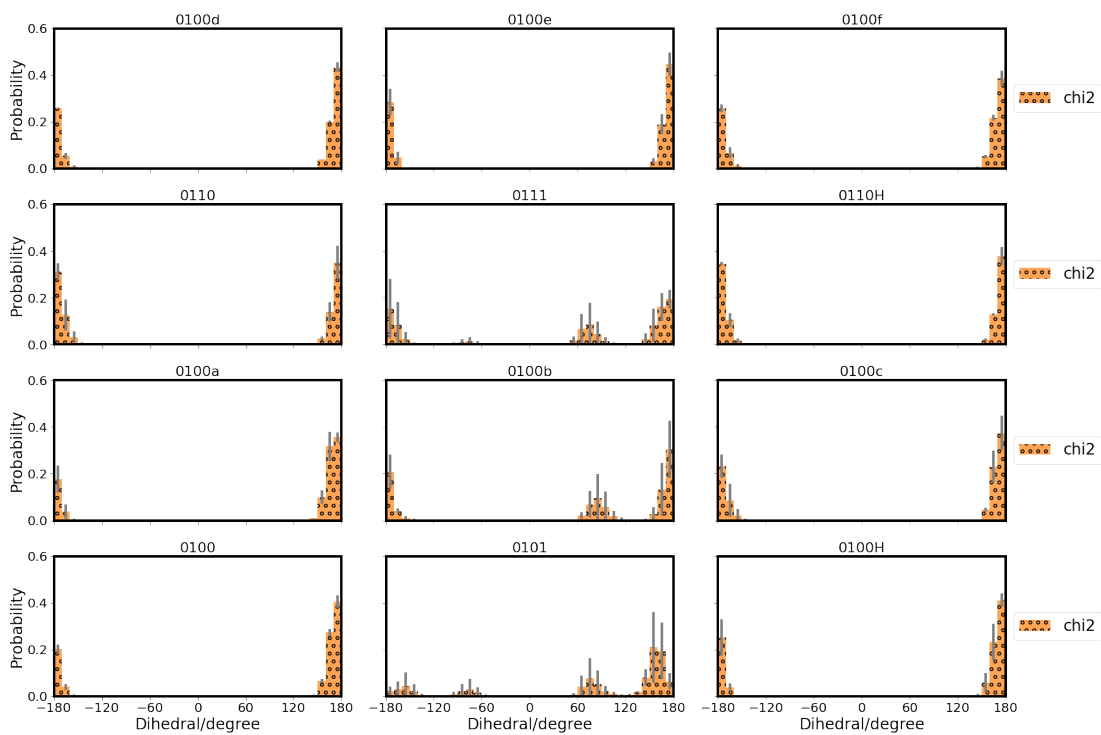

Figure S13: Probability distributions of side chain dihedral angle chi2 of E101.

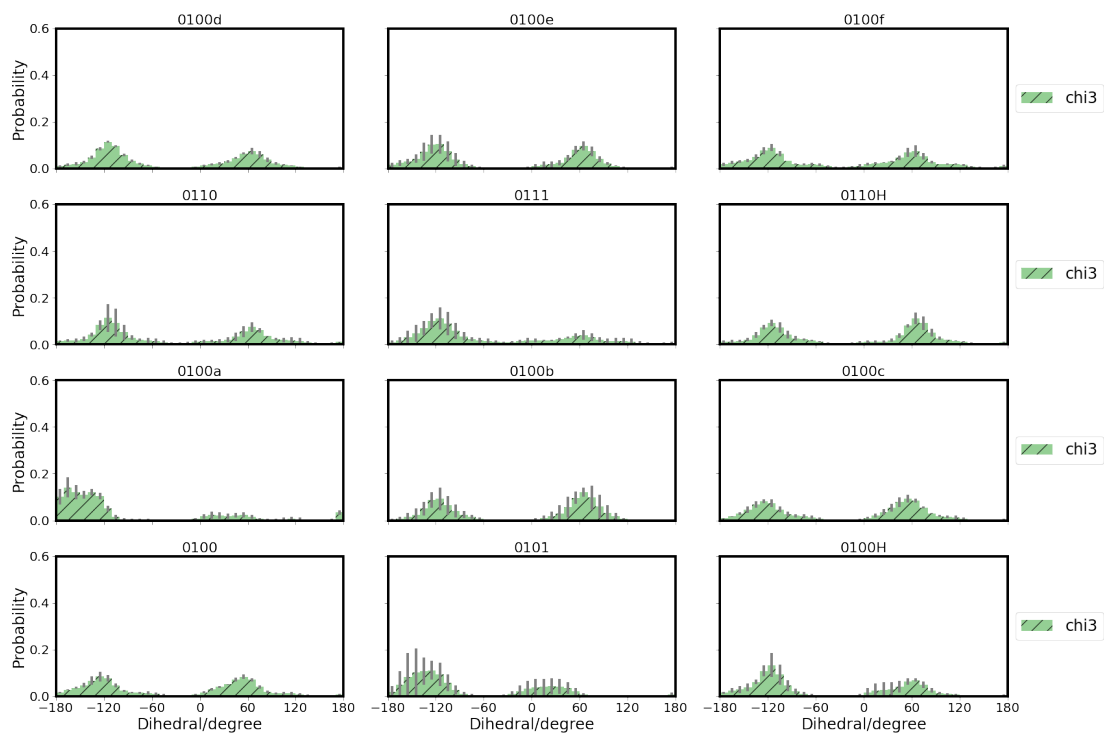

Figure S14: Probability distributions of side chain dihedral angle  $\chi_3$  of E101.

## Distances

Table S3: Average distances (in Å) between important residues in the K-channel of CcO, modelled in different protonation states.

| Model | E101-H96       | E101-S365     | E101-K362      | E101-T359      | S365-Y288      |
|-------|----------------|---------------|----------------|----------------|----------------|
| 0100f | $7.6 \pm 1.8$  | $7.8 \pm 0.2$ | $15.1 \pm 0.6$ | $17.1 \pm 0.7$ | $16.5 \pm 0.5$ |
| 0100e | $6.0 \pm 1.0$  | $7.7 \pm 0.3$ | $15.1 \pm 0.3$ | $17.1 \pm 0.2$ | $17.6 \pm 0.2$ |
| 0100d | $6.1 \pm 0.5$  | $7.6 \pm 0.3$ | $14.3 \pm 0.2$ | $16.6 \pm 0.1$ | $17.6 \pm 0.3$ |
| 0110H | $6.9 \pm 1.6$  | $7.7 \pm 0.4$ | $14.1 \pm 0.3$ | $16.7 \pm 0.3$ | $17.4 \pm 0.1$ |
| 0111  | $10.3 \pm 2.1$ | $6.7 \pm 0.4$ | $13.0 \pm 0.6$ | $15.5 \pm 0.4$ | $17.3 \pm 0.4$ |
| 0110  | $8.3 \pm 3.5$  | $7.2 \pm 0.2$ | $13.6 \pm 0.2$ | $16.2 \pm 0.2$ | $17.5 \pm 0.1$ |
| 0100c | $6.4 \pm 0.1$  | $8.1 \pm 0.2$ | $14.3 \pm 0.4$ | $16.5 \pm 0.2$ | $16.3 \pm 0.4$ |
| 0100b | $7.0 \pm 0.9$  | $6.5 \pm 0.8$ | $13.1 \pm 1.0$ | $15.8 \pm 0.8$ | $17.6 \pm 0.1$ |
| 0100a | $7.8 \pm 0.1$  | $7.5 \pm 0.2$ | $14.3 \pm 0.1$ | $17.0 \pm 0.1$ | $17.8 \pm 0.2$ |
| 0100H | $4.6 \pm 0.1$  | $7.5 \pm 0.0$ | $14.3 \pm 0.3$ | $17.1 \pm 0.0$ | $17.8 \pm 0.1$ |
| 0101  | $7.6 \pm 2.6$  | $6.0 \pm 0.7$ | $12.2 \pm 0.7$ | $15.1 \pm 1.0$ | $17.8 \pm 0.1$ |
| 0100  | $7.2 \pm 0.7$  | $7.8 \pm 0.2$ | $14.4 \pm 0.2$ | $17.1 \pm 0.0$ | $17.9 \pm 0.1$ |

| Model | H96-K362       | S365-K362     | T359-S365      | T359-Y288     | T359-K362     |
|-------|----------------|---------------|----------------|---------------|---------------|
| 0100f | $19.7 \pm 2.8$ | $9.5 \pm 0.2$ | $12.0 \pm 0.3$ | $4.9 \pm 0.6$ | $5.1 \pm 1.2$ |
| 0100e | $18.1 \pm 1.7$ | $8.4 \pm 0.3$ | $10.9 \pm 0.1$ | $7.0 \pm 0.1$ | $4.5 \pm 0.6$ |
| 0100d | $16.2 \pm 1.4$ | $8.2 \pm 0.9$ | $11.6 \pm 0.3$ | $6.1 \pm 0.6$ | $7.5 \pm 1.5$ |
| 0110H | $17.3 \pm 2.6$ | $8.2 \pm 0.3$ | $11.7 \pm 0.1$ | $5.9 \pm 0.1$ | $6.0 \pm 0.3$ |
| 0111  | $21.3 \pm 3.7$ | $8.2 \pm 0.4$ | $11.3 \pm 0.3$ | $6.2 \pm 0.4$ | $5.7 \pm 0.1$ |
| 0110  | $18.8 \pm 5.5$ | $8.4 \pm 0.3$ | $11.6 \pm 0.1$ | $6.0 \pm 0.1$ | $5.7 \pm 0.1$ |
| 0100c | $17.7 \pm 1.3$ | $8.1 \pm 0.2$ | $10.9 \pm 0.3$ | $5.5 \pm 0.1$ | $5.8 \pm 0.6$ |
| 0100b | $15.4 \pm 1.0$ | $8.0 \pm 0.2$ | $11.0 \pm 0.1$ | $6.7 \pm 0.1$ | $7.3 \pm 0.3$ |
| 0100a | $18.6 \pm 0.3$ | $8.0 \pm 0.1$ | $11.1 \pm 0.1$ | $6.7 \pm 0.1$ | $7.5 \pm 0.3$ |
| 0100H | $15.0 \pm 1.2$ | $8.1 \pm 0.2$ | $11.1 \pm 0.1$ | $6.7 \pm 0.1$ | $7.3 \pm 0.4$ |
| 0101  | $17.5 \pm 1.5$ | $8.1 \pm 0.2$ | $11.2 \pm 0.2$ | $6.8 \pm 0.1$ | $6.8 \pm 0.3$ |
| 0100  | $18.2 \pm 1.4$ | $8.2 \pm 0.3$ | $11.1 \pm 0.1$ | $6.9 \pm 0.1$ | $7.0 \pm 0.5$ |

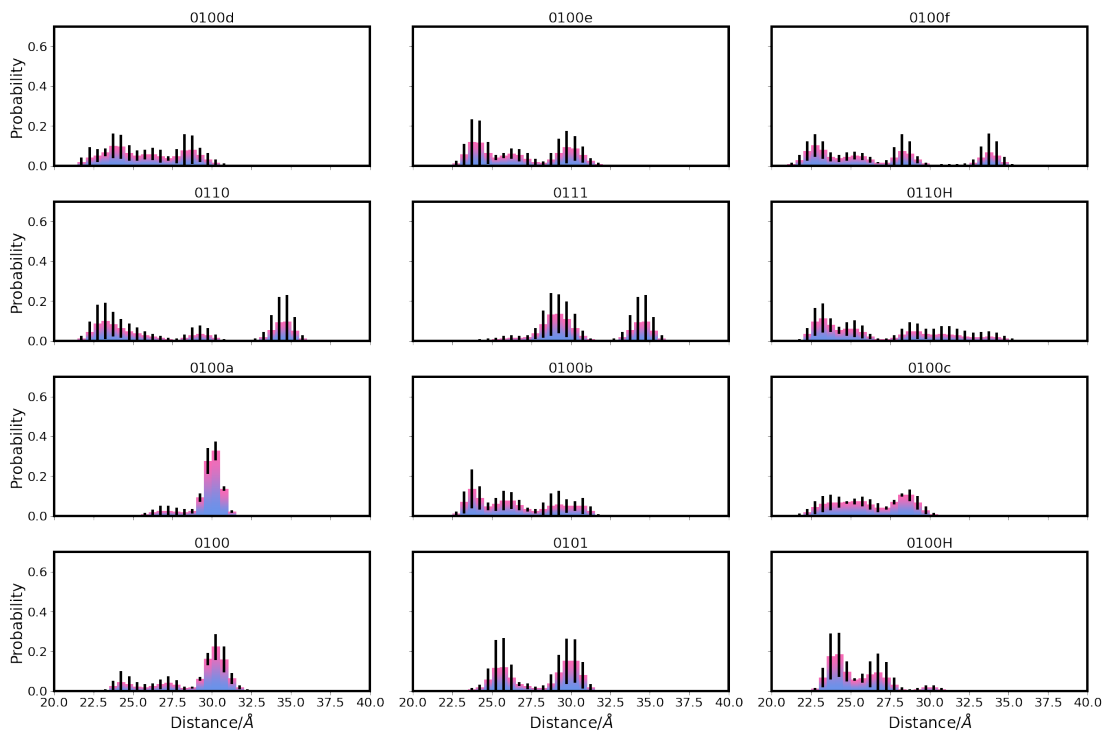

Figure S15: Probability distributions of distances between H96 and Y288.

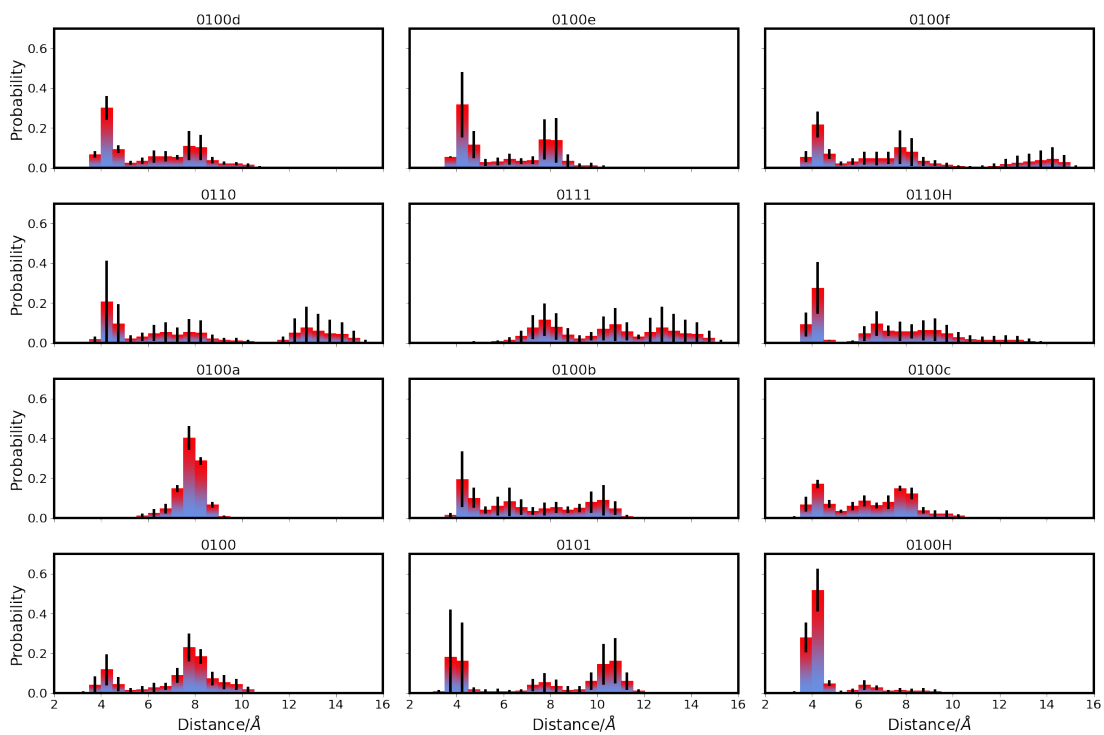

Figure S16: Probability distributions of distances between H96 and E101.

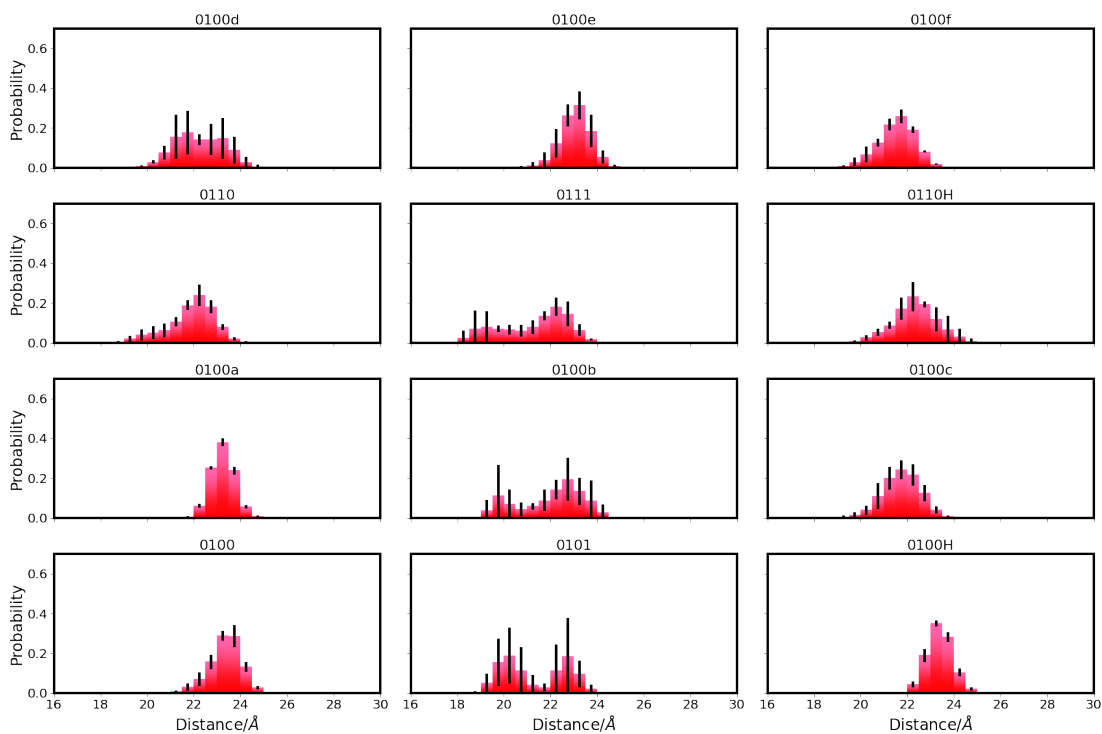

Figure S17: Probability distributions of distances between E101 and Y288.

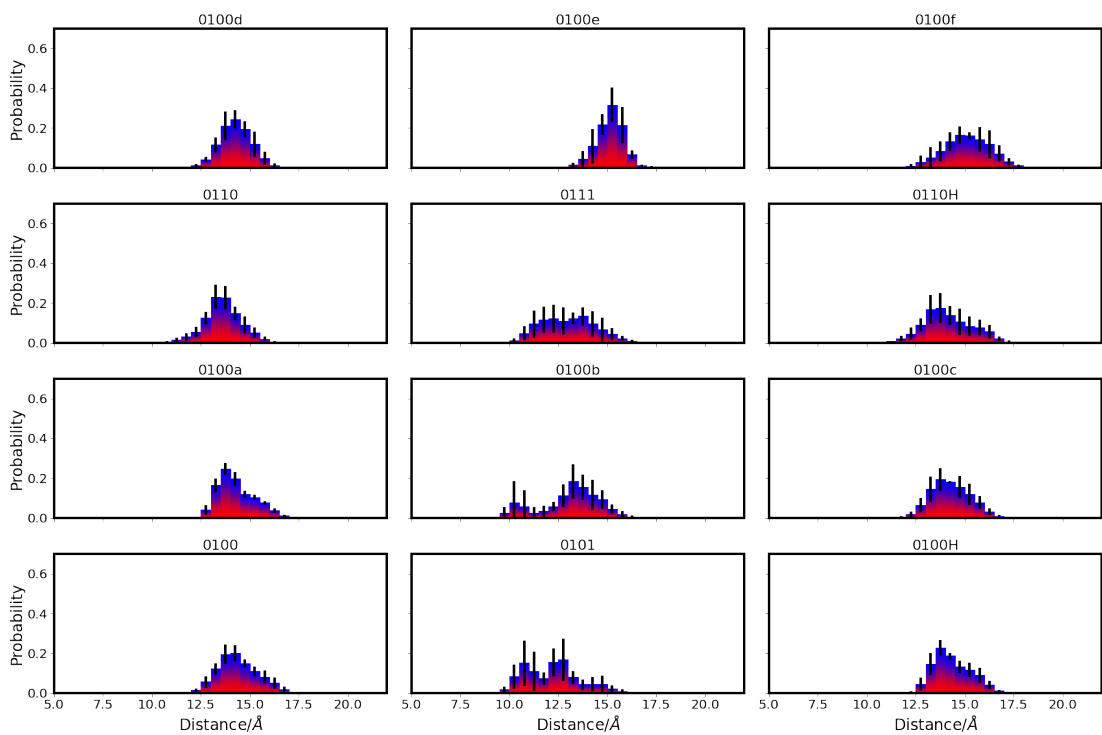

Figure S18: Probability distributions of distances between E101 and K362.

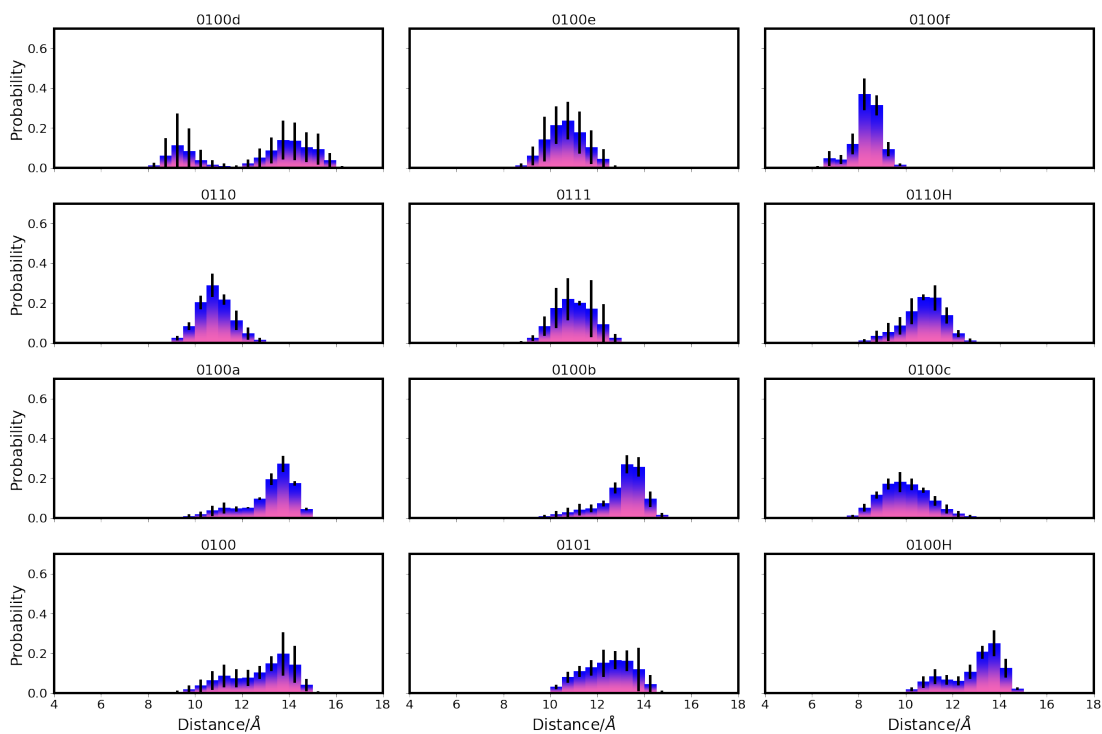

Figure S19: Probability distributions of distances between K362 and Y288.

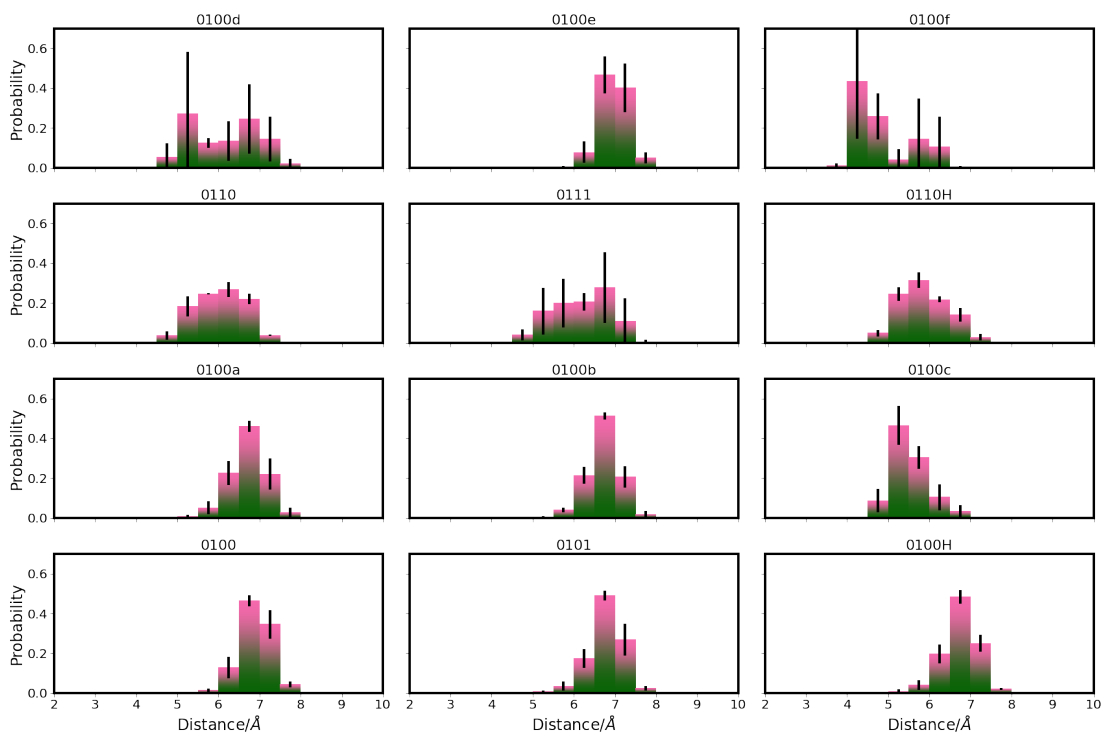

Figure S20: Probability distributions of distances between T359 and Y288.

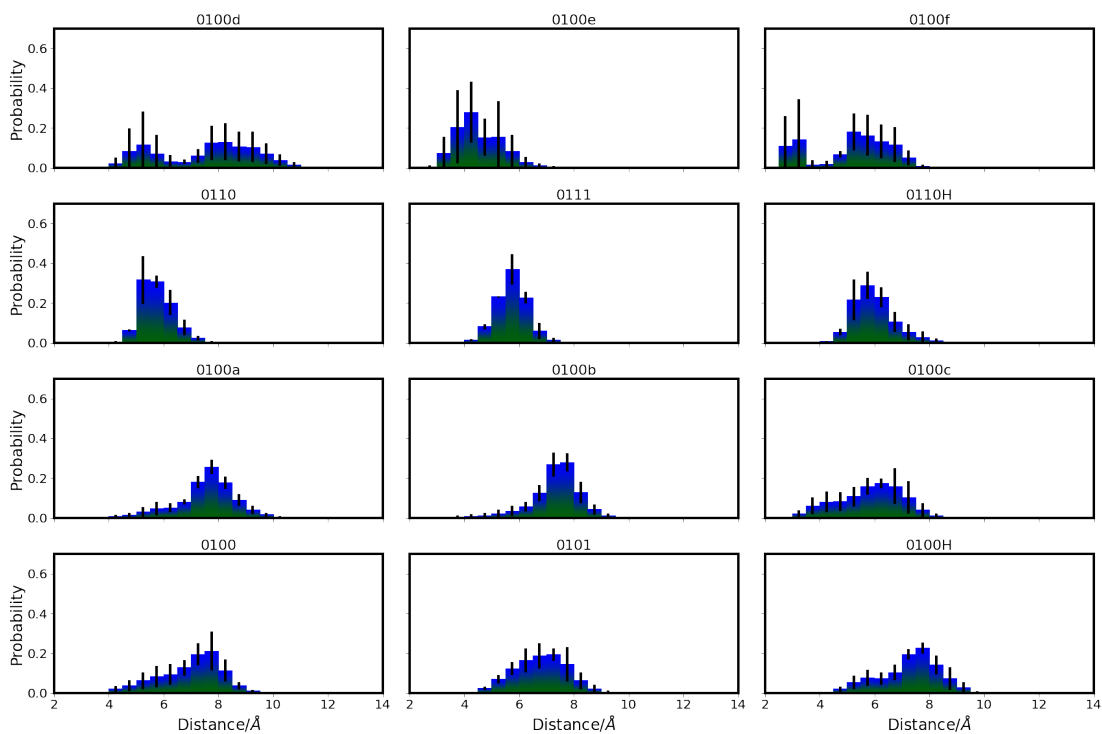

Figure S21: Probability distributions of distances between T359 and K362.

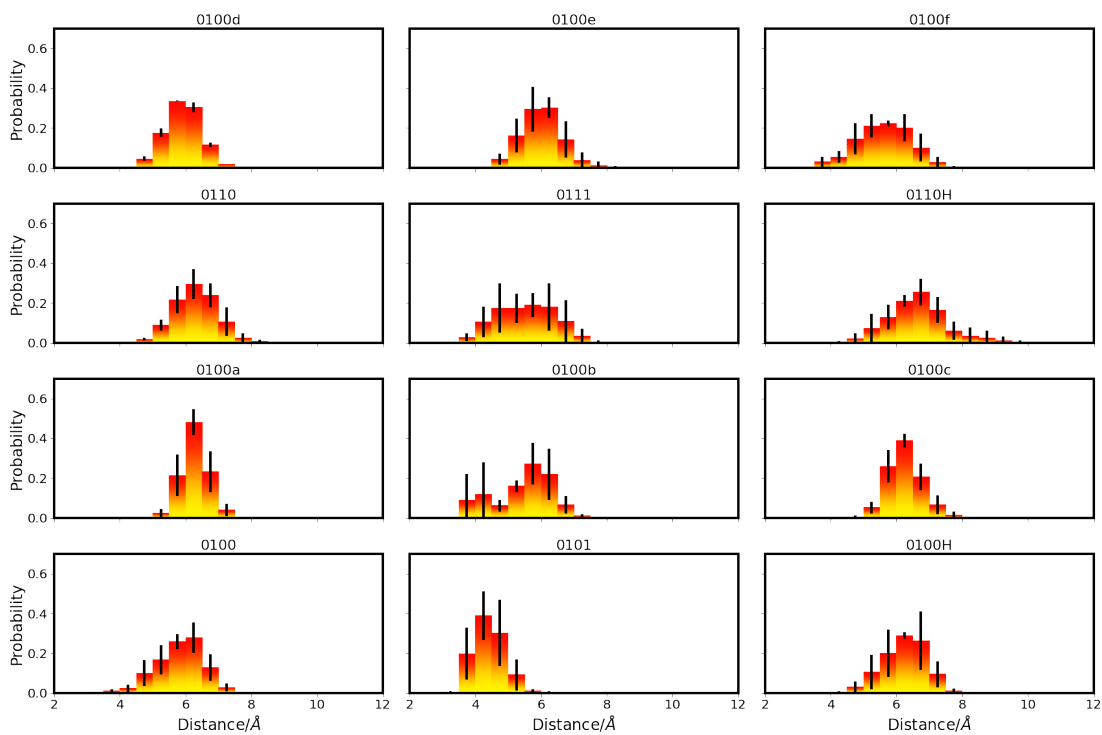

Figure S22: Probability distributions of distances between P315 and E101.



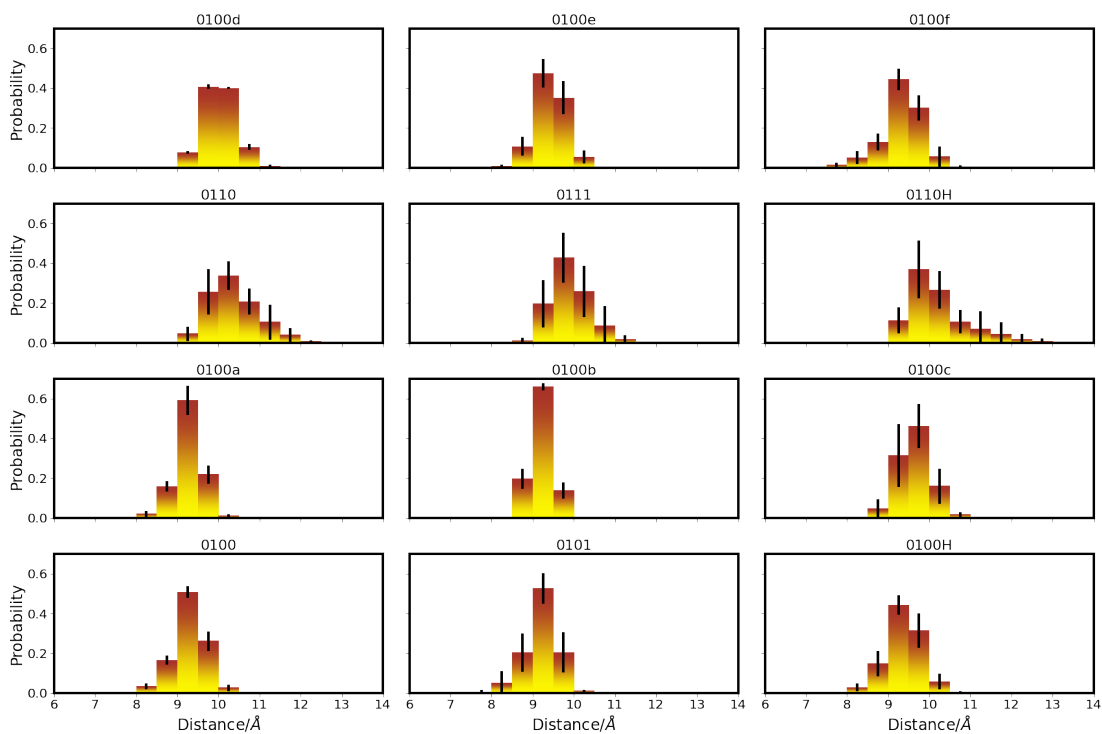

Figure S23: Probability distributions of distances between P315 and S365.

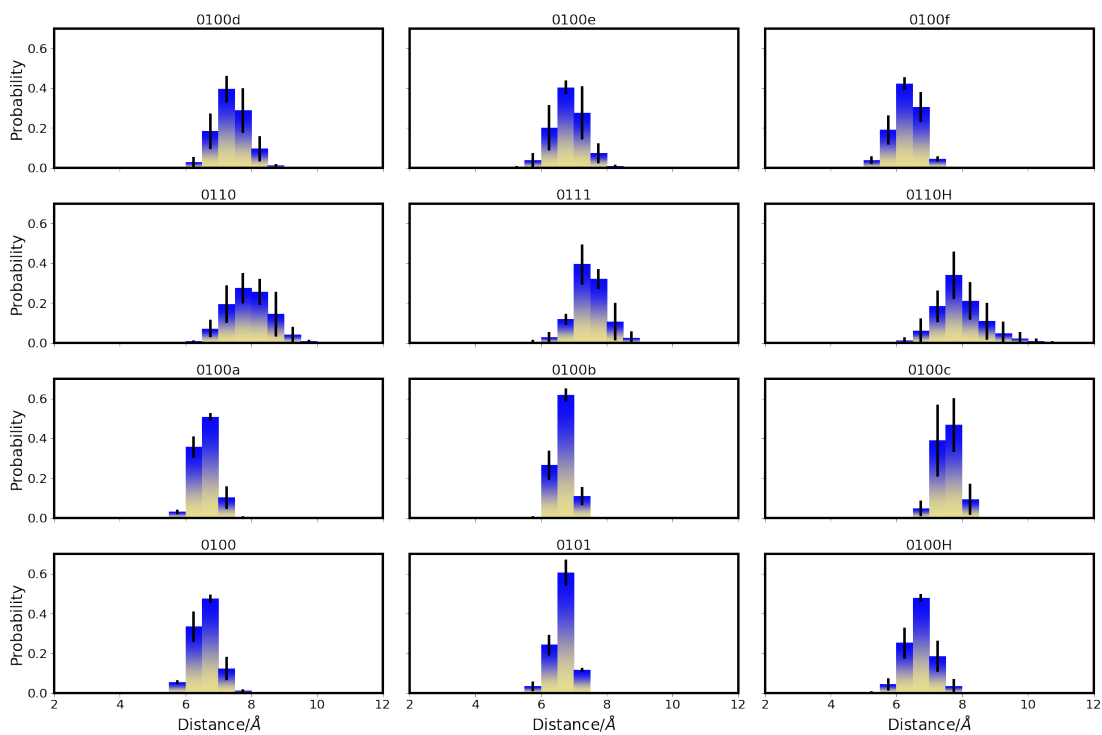

Figure S24: Probability distributions of distances between M316 and K362.

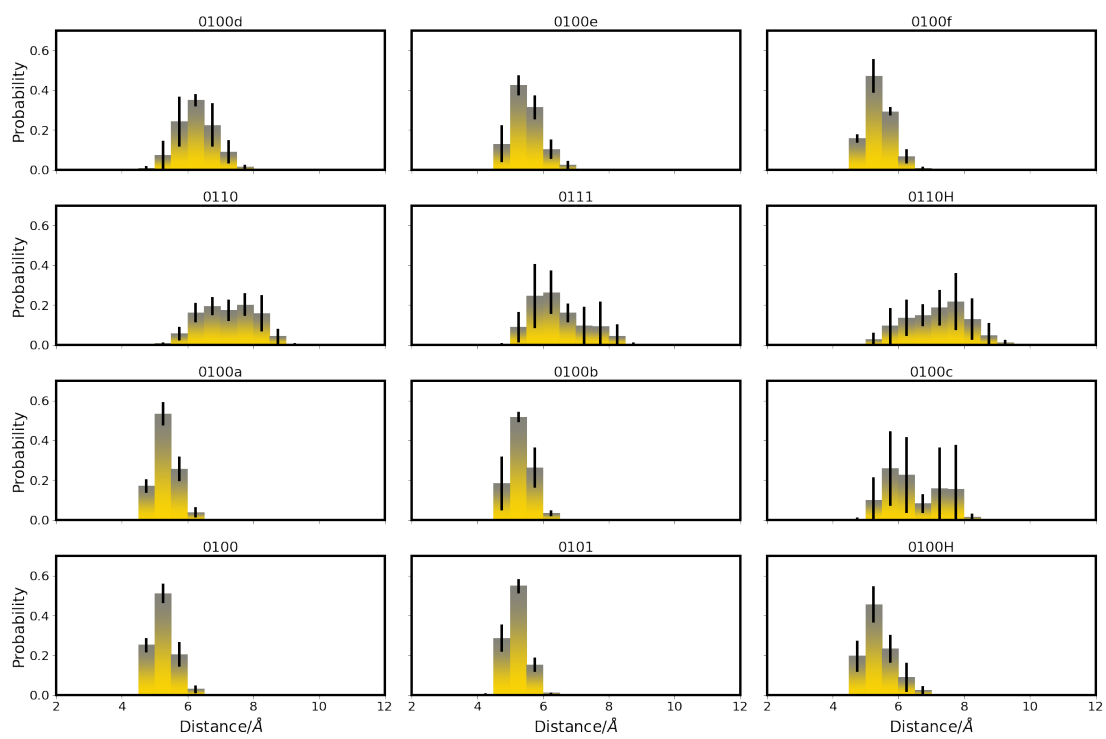

Figure S25: Probability distributions of distances between P358 and A319.
